# Supplementary material
Source: PubMed Central journal article supplement (PMC4543995)

# Supporting Information

## A Bright Fluorescent Probe Enables Analyte-Responsive H<sub>2</sub>S, 3D Imaging in Live Zebrafish using Light Sheet Microscopy

Matthew D. Hammers,<sup>1</sup> Michael J. Taormina,<sup>2</sup> Matthew M. Cerda, Leticia A. Montoya,<sup>1,3</sup> Daniel T. Seidenkranz,<sup>1</sup> Raghuvveer Parthasarathy,<sup>2,3,4</sup> Michael D. Pluth<sup>1,3,4,\*</sup>

<sup>1</sup>Department of Chemistry and Biochemistry

<sup>2</sup>Department of Physics

<sup>3</sup>Institute of Molecular Biology

<sup>4</sup>Materials Science Institute

University of Oregon, Eugene, Oregon 97403-1253

Contact Information:

Michael D. Pluth  
pluth@uoregon.edu

| Table of Contents                                               | Page  |
|-----------------------------------------------------------------|-------|
| 1. Figure S1 – MeRho Absorption and Emission Spectra            | S2    |
| 2. Figure S2 – MeRho and Fluorescein pH Dependence              | S3    |
| 3. Table S1 – Tabulated Detection Limit Data                    | S3    |
| 4. Figure S3 – GSH-Dependent H <sub>2</sub> S Release from DATS | S4    |
| 5. Video S1 – 3D Video of Zebrafish Fluorescence                | S5    |
| 6. NMR Spectra of Synthesized Compounds                         | S6-S8 |

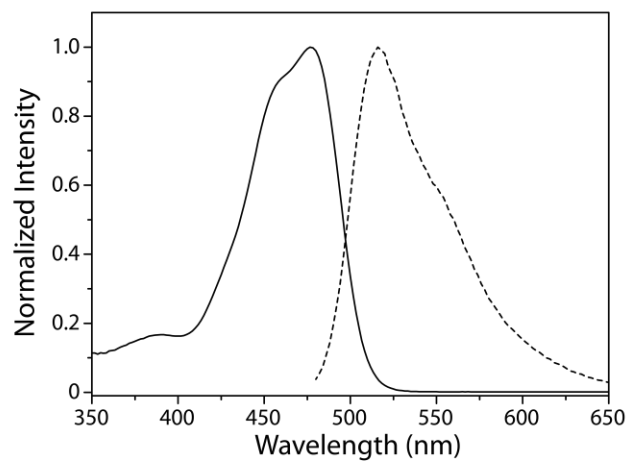

**Figure S1.** Normalized absorption (solid line) and emission (dashed line) spectra of **MeRho**.  
Conditions: 5  $\mu$ M **MeRho**, PIPES buffer (50 mM, 100 mM KCl, pH 7.4),  $\lambda_{\text{ex}} = 476$  nm

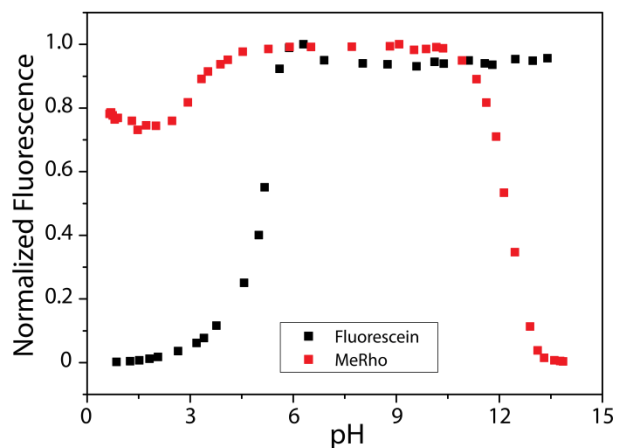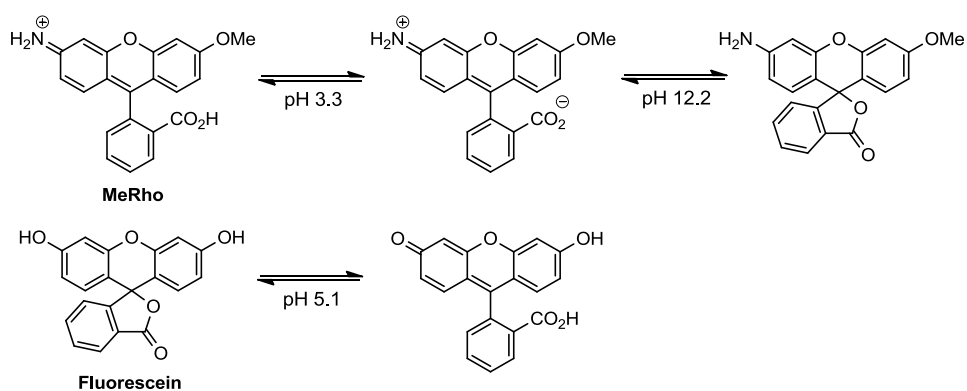

**Figure S2.** (top) Integrated fluorescein (20  $\mu\text{M}$ ,  $\lambda_{\text{ex}} = 494 \text{ nm}$ ,  $\lambda_{\text{em}} = 500\text{-}650 \text{ nm}$ ) and **MeRho** (20  $\mu\text{M}$ ,  $\lambda_{\text{ex}} = 476 \text{ nm}$ ,  $\lambda_{\text{em}} = 480\text{-}650 \text{ nm}$ ) fluorescence in aqueous solution at various pH (100 mM KCl). (bottom) Proposed protonation/deprotonation transitions of **MeRho** and fluorescein at various pH.

| <u>[H<sub>2</sub>S] (<math>\mu\text{M}</math>)</u> | <u>Integrated Fluorescence</u> | <u>Standard Deviation</u> |
|----------------------------------------------------|--------------------------------|---------------------------|
| Blank                                              | 612234                         | 141173                    |
| 0.10                                               | 1093559                        | 74073                     |
| 2.5                                                | 13564824                       | 2539964                   |
| 5.0                                                | 24469632                       | 4032106                   |
| 7.5                                                | 30622452                       | 4228960                   |
| 15                                                 | 58199116                       | 8051924                   |

**Table S1.** Tabulated detection limit data of toward H<sub>2</sub>S. Conditions: 5  $\mu\text{M}$  **MeRho-Az**, PIPES buffer (50 mM, 100 mM KCl, pH 7.4),  $\lambda_{\text{ex}} = 476 \text{ nm}$ ,  $\lambda_{\text{em}} = 480\text{-}650 \text{ nm}$ , 37  $^{\circ}\text{C}$ . Each concentration represents the average of at least three trials.

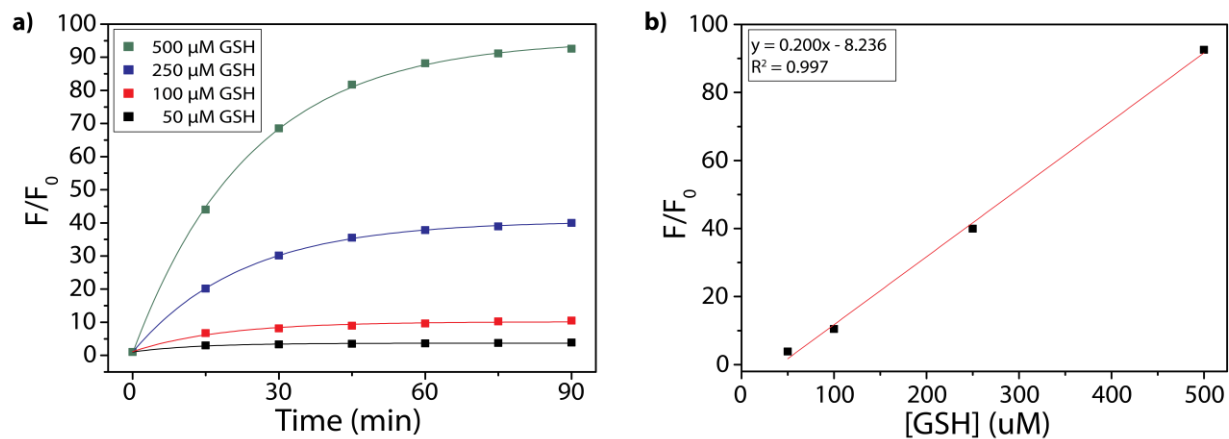

**Figure S3.** a) Fluorescent response of **MeRho-Az** to H<sub>2</sub>S released from DATS with various [GSH] over 90 minutes. Conditions: 5 μM **MeRho-Az**, 300 μM DATS, 50-500 μM GSH, PIPES buffer (50 mM, 100 mM KCl, pH 7.4),  $\lambda_{\text{ex}} = 476$  nm,  $\lambda_{\text{em}} = 480$ -650 nm, 37 °C. b) Linear relationship between observed fluorescence turn-on from H<sub>2</sub>S release and [GSH].

**Video S1.** Three dimensional scan of the intestinal bulb of a 7 dpf zebrafish gavaged with a solution of 5uM MeRho-Az, 250 uM DATS, and 250 uM GSH (intensity false color, as in Figure 5b). Field of view is 412 x 230  $\mu\text{m}^2$  and each frame represents a 1  $\mu\text{m}$  step deeper into the larva. Shadows seen at ~18 seconds result from pigment cells distributed along the ventral midline. Autofluorescent cells external to the gut can also be seen.

## NMR Spectra

$^1\text{H}$  (500 MHz,  $\text{CDCl}_3$ ) and  $^{13}\text{C}\{^1\text{H}\}$  (125 MHz,  $\text{CDCl}_3$ ) NMR Spectra of **2**

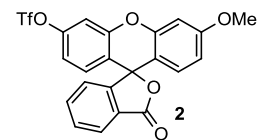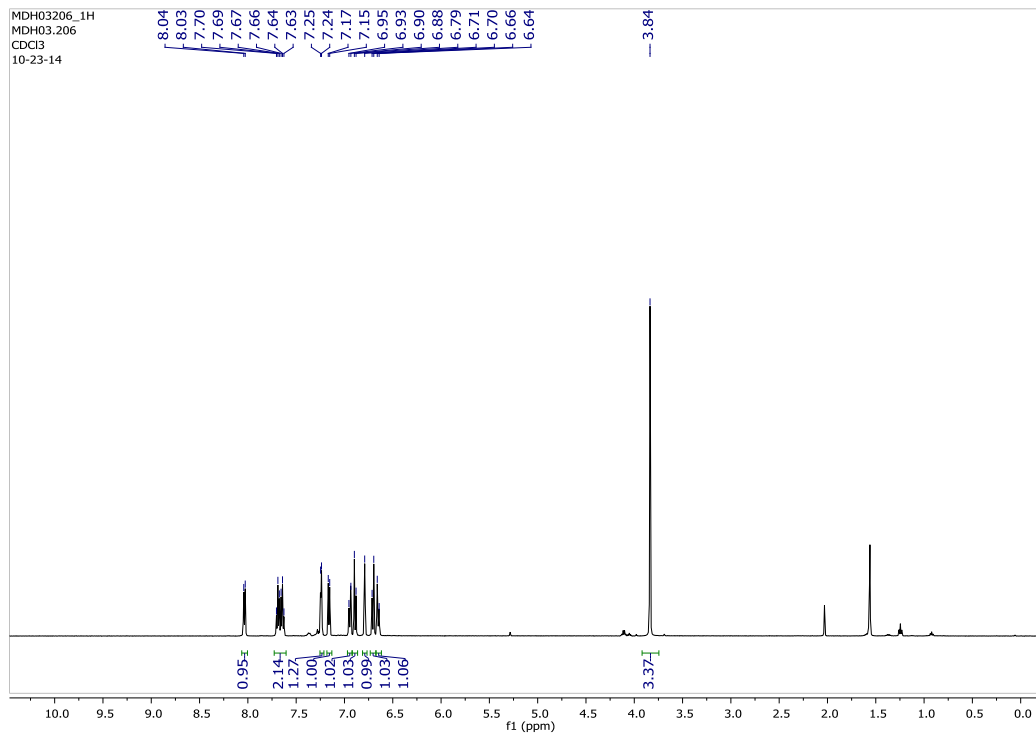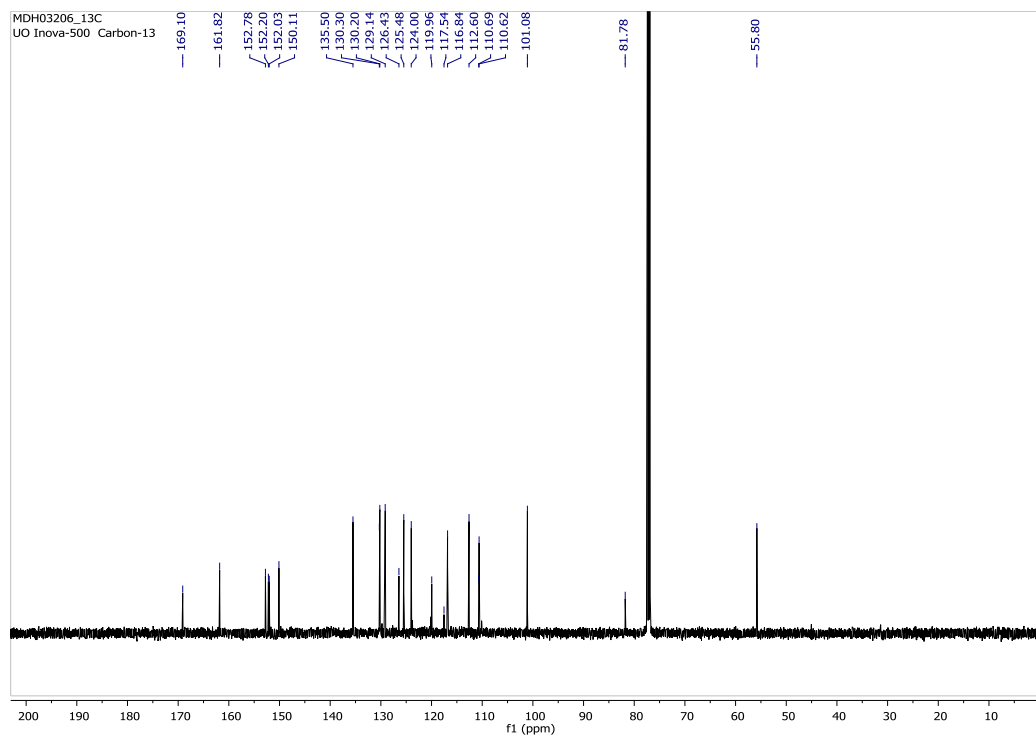

$^1\text{H}$  (500 MHz,  $\text{CDCl}_3$ ) and  $^{13}\text{C}\{^1\text{H}\}$  (125 MHz,  $\text{CDCl}_3$ ) NMR Spectra of **MeRho**

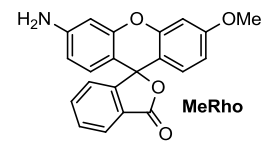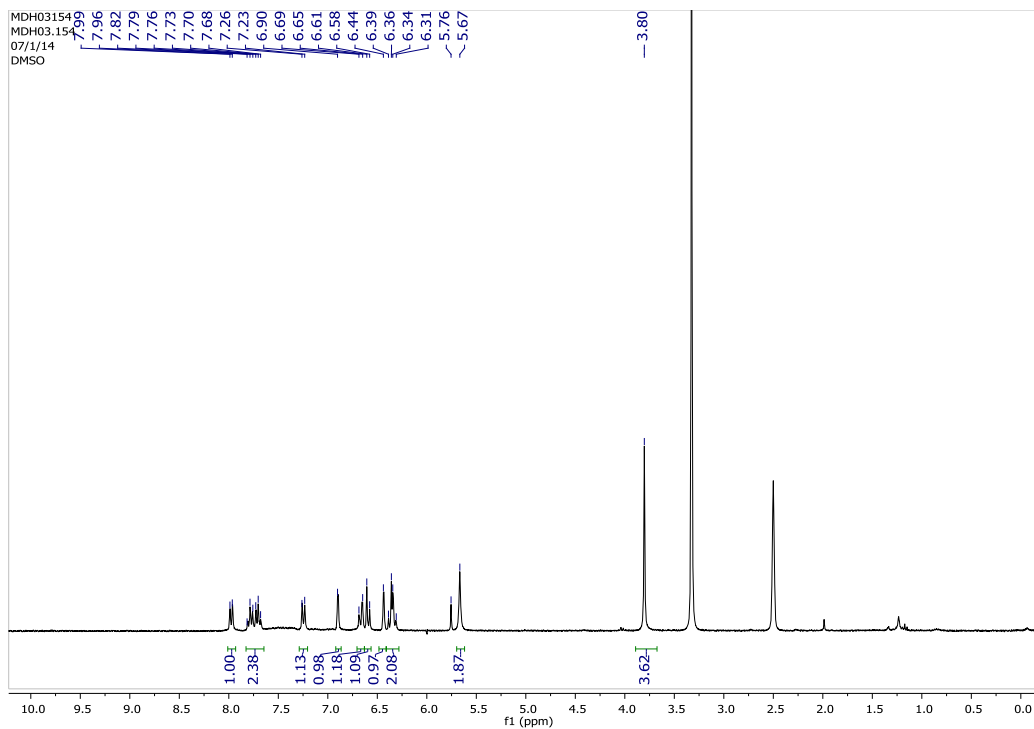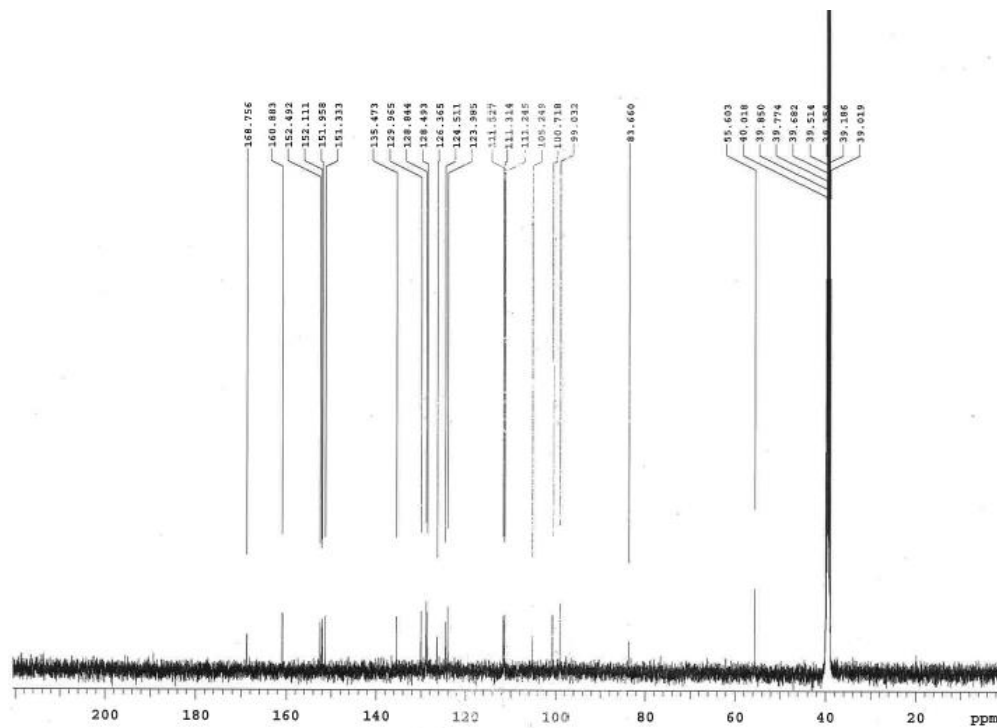

$^1\text{H}$  (600 MHz,  $\text{CDCl}_3$ ) and  $^{13}\text{C}\{^1\text{H}\}$  (125 MHz,  $\text{CDCl}_3$ ) NMR Spectra of **MeRho-Az**

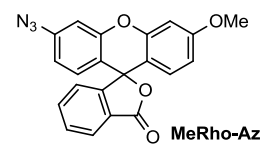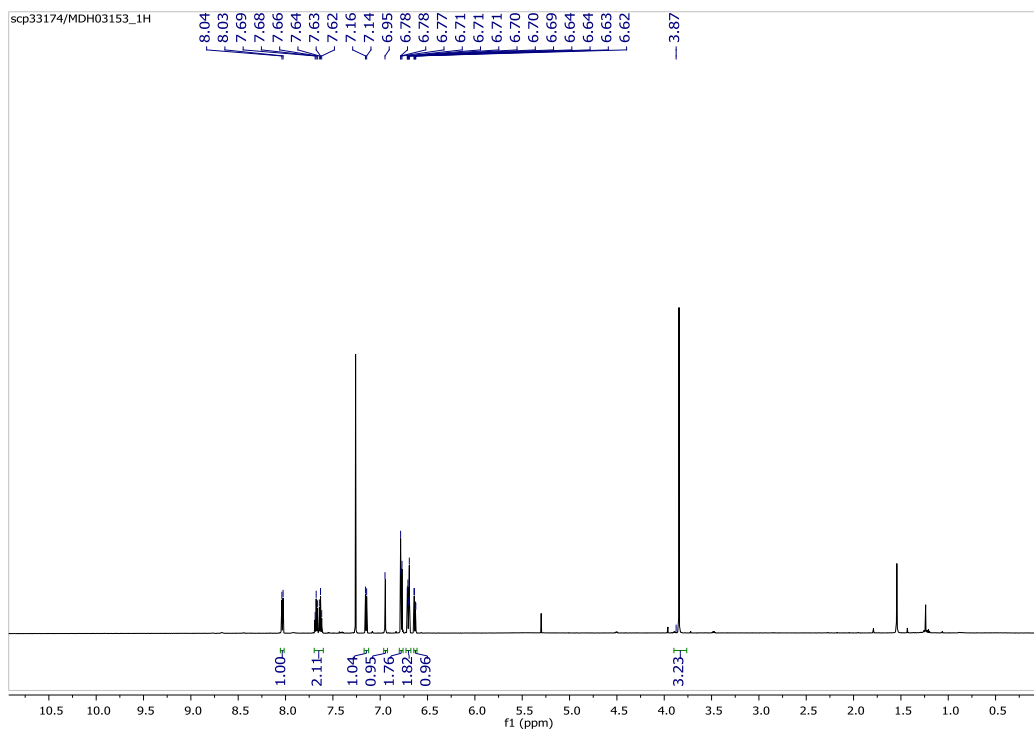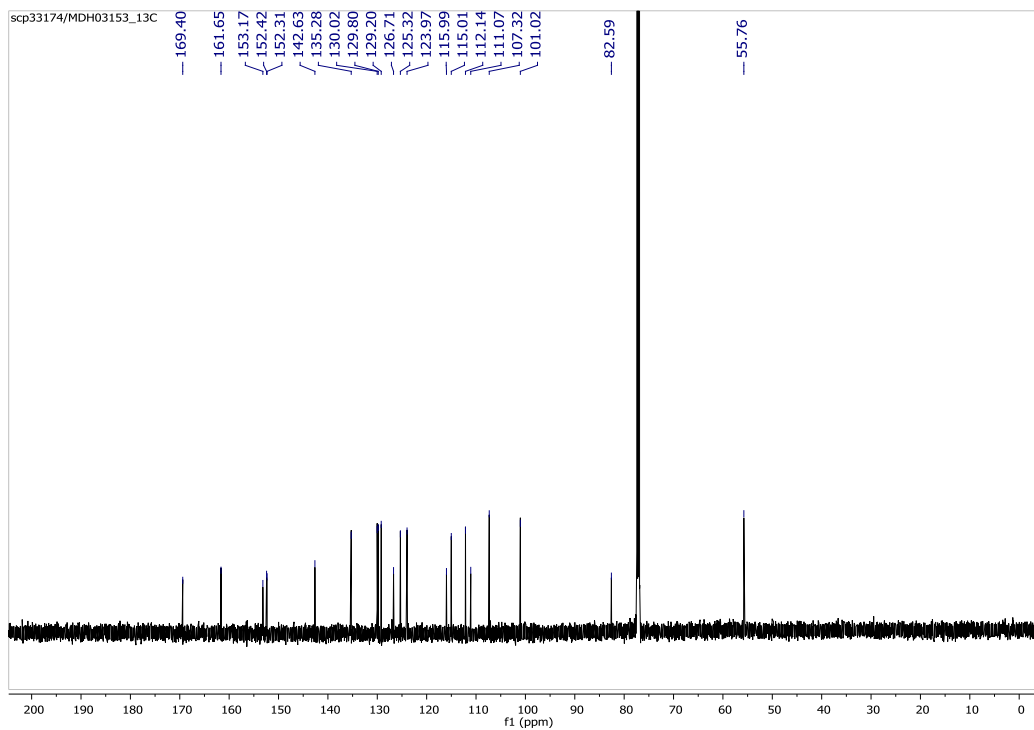

Supplement: ja5b04196_si_001.pdf [file ja5b04196_si_001.pdf]
